# Supplementary material for: Modulation of salt tolerance in Thai jasmine rice (Oryza sativa L. cv. KDML105) by Streptomyces venezuelae ATCC 10712 expressing ACC deaminase
Source: PubMed Central journal article supplement (PMC6361907; doi:10.1038/s41598-018-37987-5), 2019-02-04
Supplement: 41598_2018_37987_MOESM1_ESM.pdf [file 41598_2018_37987_MOESM1_ESM.pdf]

## **Supplementary Information**

**Modulation of salt tolerance in Thai jasmine rice (*Oryza sativa* L. cv. KDML105) by  
*Streptomyces venezuelae* ATCC 10712 expressing ACC deaminase**

Suranan Yoolong, Worarat Kruasuwan, Huyền Thị Thanh Phạm, Ratchaniwan Jaemsaeng,  
Chatchawan Jantasuriyarat and Arinthip Thamchaipenet\*

Department of Genetics, Faculty of Science, Kasetsart University, Bangkok, Thailand

\*Correspondence and requests for materials should be addressed to A.T.

(E-mail: arinthip.t@ku.ac.th)

## Supplementary Figures

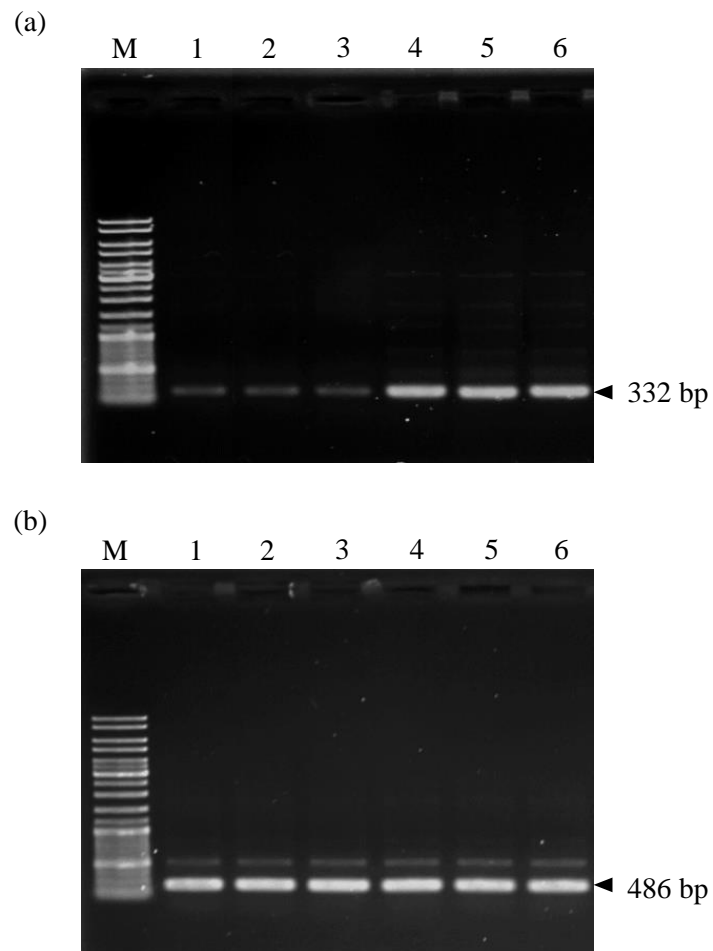

**Supplementary Fig. S1** Transcriptional analysis of *acdS* (a) and *hrdB* (b) genes of *S. venezuelae* and its overexpressing mutant by semi-quantitative RT-PCR. Lane M, 1 kb ladder; Lane 1-3, *S. venezuelae*/pIJ86; Lane 4-6, *S. venezuelae*/pIJ86-*acdS*.

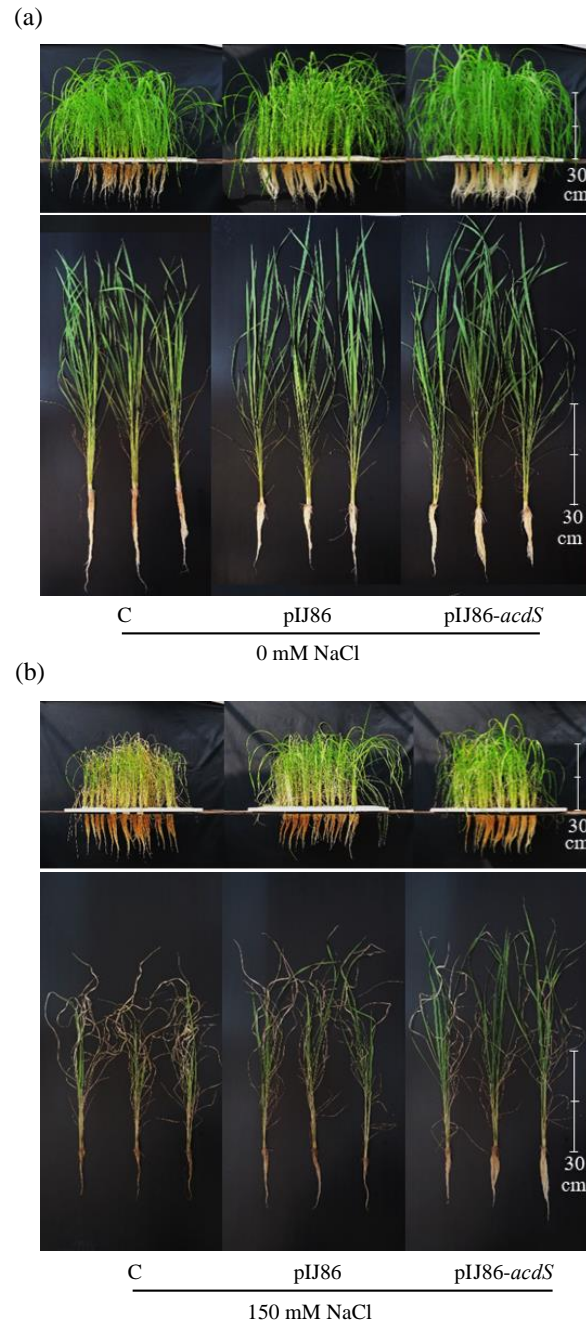

**Supplementary Fig. S2** Effect of ACC deaminase-producing *Streptomyces venezuelae* and its overexpressing mutant on the physiology of rice KDML105 after 7 days of non-salt (a) and salt stress (b) treatments under hydroponic conditions. C, uninoculated rice control; pIJ86, rice inoculated with *S. venezulae*/pIJ86; pIJ86-*acdS*, rice inoculated with *S. venezulae*/pIJ86-*acdS*.

## Supplementary Tables

**Supplementary Table S1** Plant growth promoting (PGP) traits of *Streptomyces venezuelae*

| PGP-traits           |                                                                      |
|----------------------|----------------------------------------------------------------------|
| ACC deaminase        | 364.21 ± 19.28 nmol α-keto.mg protein <sup>-1</sup> .h <sup>-1</sup> |
| IAA production       | 21 ± 1.02 µg.mL <sup>-1</sup>                                        |
| Proline accumulation |                                                                      |
| 0% NaCl              | 21.12 ± 0.30 µM                                                      |
| 1% NaCl              | 25.71 ± 0.39 µM                                                      |
| 2% NaCl              | 30.33 ± 0.59 µM                                                      |
| 3% NaCl              | 36.66 ± 0.24 µM                                                      |

**Supplementary Table S2** ACC deaminase activity of *Streptomyces venezuelae* and its overexpressing mutant grown in MM supplemented with 0.3 mM ACC at 24, 48, 72 and 96 h. The values show the mean ± S.E. of three replicates and an asterisk (\*) represents statistically significant different activity (t test,  $p < 0.05$ ). pIJ86, *S. venezuelae*/pIJ86; pIJ86-*acdS*, *S. venezuelae*/pIJ86-*acdS*.

| Strain             | ACC deaminase activity (nmol α-keto mg protein <sup>-1</sup> h <sup>-1</sup> ) |                   |                   |                   |
|--------------------|--------------------------------------------------------------------------------|-------------------|-------------------|-------------------|
|                    | 24 h                                                                           | 48 h              | 72 h              | 96 h              |
| pIJ86              | 189.18 ± 10.98                                                                 | 334.70 ± 14.02    | 364.21 ± 19.28    | 355.21 ± 12.28    |
| pIJ86- <i>acdS</i> | 659.68 ± 11.48*                                                                | 1,465.68 ± 25.34* | 1,820.10 ± 13.05* | 1,783.10 ± 40.05* |

**Supplementary Table S3** Semi-quantitative RT-PCR expression profile of *acdS* in *S. venezuelae*/pIJ86 (pIJ86) and *S. venezuelae*/pIJ86 (pIJ86-*acdS*). The expression ratio of *acdS* gene was normalized against the expression of a housekeeping gene, *hrdB*. The values show the mean ± S.E. of three replicates and an asterisk (\*) represents statistically-significant different activity (t test,  $p < 0.05$ ).

| Strain             | Expression ratio |
|--------------------|------------------|
| pIJ86              | 0.351 ± 0.001    |
| pIJ86- <i>acdS</i> | 0.950 ± 0.006*   |

**Supplementary Table S4** Plant growth parameters of rice KDML105 associated with and without ACC deaminase-producing *Streptomyces venezuelae* and the ACC deaminase-overexpressing mutant under non-salt and salt stress treatments. The values show the mean  $\pm$  S.E. of twelve replicates and different letters are significantly different (Tukey's test,  $p < 0.05$ ). C, uninoculated rice control; pIJ86, rice inoculated with *S. venezuelae*/pIJ86; pIJ86-*acdS*, rice inoculated with *S. venezuelae*/pIJ86-*acdS*; ND, not detected.

| Plant growth parameters                                                 | 0 mM NaCl                      |                               |                               | 150 mM NaCl                    |                                |                                |
|-------------------------------------------------------------------------|--------------------------------|-------------------------------|-------------------------------|--------------------------------|--------------------------------|--------------------------------|
|                                                                         | C                              | pIJ86                         | pIJ86- <i>acdS</i>            | C                              | pIJ86                          | pIJ86- <i>acdS</i>             |
| Length (cm)                                                             |                                |                               |                               |                                |                                |                                |
| Shoot                                                                   | 67.17 $\pm$ 1.06 <sup>bc</sup> | 78.75 $\pm$ 2.54 <sup>a</sup> | 80.75 $\pm$ 1.78 <sup>a</sup> | 59.92 $\pm$ 1.29 <sup>d</sup>  | 66.25 $\pm$ 0.39 <sup>c</sup>  | 72.58 $\pm$ 0.50 <sup>b</sup>  |
| Root                                                                    | 19.08 $\pm$ 0.66 <sup>ab</sup> | 20.75 $\pm$ 0.60 <sup>a</sup> | 20.50 $\pm$ 0.44 <sup>a</sup> | 15.08 $\pm$ 0.29 <sup>d</sup>  | 16.92 $\pm$ 0.23 <sup>c</sup>  | 18.00 $\pm$ 0.17 <sup>bc</sup> |
| Fresh weight (g plant <sup>-1</sup> )                                   |                                |                               |                               |                                |                                |                                |
| Shoot                                                                   | 1.09 $\pm$ 0.04 <sup>b</sup>   | 1.62 $\pm$ 0.06 <sup>a</sup>  | 1.56 $\pm$ 0.04 <sup>a</sup>  | 0.52 $\pm$ 0.03 <sup>d</sup>   | 0.84 $\pm$ 0.02 <sup>c</sup>   | 1.07 $\pm$ 0.02 <sup>b</sup>   |
| Root                                                                    | 0.18 $\pm$ 0.00 <sup>b</sup>   | 0.22 $\pm$ 0.01 <sup>a</sup>  | 0.22 $\pm$ 0.01 <sup>a</sup>  | 0.13 $\pm$ 0.01 <sup>c</sup>   | 0.21 $\pm$ 0.01 <sup>a</sup>   | 0.02 $\pm$ 0.01 <sup>a</sup>   |
| Dry weight (g plant <sup>-1</sup> )                                     |                                |                               |                               |                                |                                |                                |
| Shoot                                                                   | 0.16 $\pm$ 0.01 <sup>b</sup>   | 0.23 $\pm$ 0.01 <sup>a</sup>  | 0.23 $\pm$ 0.01 <sup>a</sup>  | 0.11 $\pm$ 0.01 <sup>c</sup>   | 0.17 $\pm$ 0.005 <sup>b</sup>  | 0.20 $\pm$ 0.00 <sup>a</sup>   |
| Root                                                                    | 0.03 $\pm$ 0.00 <sup>c</sup>   | 0.04 $\pm$ 0.00 <sup>a</sup>  | 0.04 $\pm$ 0.00 <sup>a</sup>  | 0.02 $\pm$ 0.00 <sup>d</sup>   | 0.03 $\pm$ 0.00 <sup>bc</sup>  | 0.04 $\pm$ 0.00 <sup>ab</sup>  |
| Relative water content (%)                                              | 96.06 $\pm$ 1.14 <sup>a</sup>  | 96.87 $\pm$ 1.01 <sup>a</sup> | 96.79 $\pm$ 1.08 <sup>a</sup> | 64.11 $\pm$ 2.39 <sup>c</sup>  | 89.08 $\pm$ 1.81 <sup>b</sup>  | 92.93 $\pm$ 0.66 <sup>b</sup>  |
| Ethylene emission<br>( $\mu$ moles g <sup>-1</sup> FW h <sup>-1</sup> ) | 0.92 $\pm$ 0.04 <sup>c</sup>   | 0.69 $\pm$ 0.02 <sup>d</sup>  | 0.68 $\pm$ 0.03 <sup>d</sup>  | 1.98 $\pm$ 0.10 <sup>a</sup>   | 1.24 $\pm$ 0.07 <sup>b</sup>   | 0.93 $\pm$ 0.04 <sup>c</sup>   |
| Proline content ( $\mu$ mole g <sup>-1</sup> FW)                        | 35.50 $\pm$ 1.58 <sup>d</sup>  | 34.66 $\pm$ 1.28 <sup>d</sup> | 39.33 $\pm$ 3.34 <sup>d</sup> | 119.85 $\pm$ 4.25 <sup>c</sup> | 144.68 $\pm$ 7.58 <sup>b</sup> | 168.29 $\pm$ 9.07 <sup>a</sup> |
| Total chlorophyll (mg g <sup>-1</sup> FW)                               | 0.10 $\pm$ 0.02 <sup>d</sup>   | 0.17 $\pm$ 0.03 <sup>a</sup>  | 0.17 $\pm$ 0.00 <sup>a</sup>  | 0.13 $\pm$ 0.00 <sup>c</sup>   | 0.15 $\pm$ 0.01 <sup>b</sup>   | 0.15 $\pm$ 0.00 <sup>b</sup>   |

**Supplementary Table S4 (Cont.)**

|                                                 | 0 mM NaCl                 |                           |                           | 150 mM NaCl               |                            |                            |
|-------------------------------------------------|---------------------------|---------------------------|---------------------------|---------------------------|----------------------------|----------------------------|
|                                                 | C                         | pIJ86                     | pIJ86- <i>acdS</i>        | C                         | pIJ86                      | pIJ86- <i>acdS</i>         |
| MDA (nmol g <sup>-1</sup> FW)                   | 28.79 ± 1.50 <sup>c</sup> | 27.48 ± 1.23 <sup>c</sup> | 28.21 ± 1.26 <sup>c</sup> | 42.63 ± 1.10 <sup>a</sup> | 33.45 ± 1.38 <sup>b</sup>  | 32.88 ± 1.77 <sup>b</sup>  |
| Na <sup>+</sup> content (mg g <sup>-1</sup> DW) | 0.63 ± 0.09 <sup>c</sup>  | 0.70 ± 0.03 <sup>c</sup>  | 0.77 ± 0.03 <sup>c</sup>  | 35.53 ± 3.94 <sup>a</sup> | 27.83 ± 5.76 <sup>ab</sup> | 24.83 ± 2.18 <sup>b</sup>  |
| K <sup>+</sup> content (mg g <sup>-1</sup> DW)  | 29.00 ± 6.14 <sup>b</sup> | 38.83 ± 3.99 <sup>a</sup> | 40.40 ± 4.30 <sup>a</sup> | 12.50 ± 2.15 <sup>c</sup> | 27.47 ± 1.83 <sup>b</sup>  | 33.00 ± 2.96 <sup>ab</sup> |
| CFU g root FW <sup>-1</sup>                     | ND                        | 2.45×10 <sup>4</sup>      | 6.03×10 <sup>3</sup>      | ND                        | 7.19×10 <sup>4</sup>       | 2.74×10 <sup>4</sup>       |
